# Supplementary material for: Increased FOXJ1 protein expression is associated with improved overall survival in high-grade serous ovarian carcinoma: an Ovarian Tumor Tissue Analysis Consortium Study
Source: PubMed Central journal article supplement (PMC9814937; doi:10.1038/s41416-022-02014-y), 2022-11-02
Supplement: 41416_2022_2014_MOESM3_ESM.pdf [file 41416_2022_2014_MOESM3_ESM.pdf]

**Increased FOXJ1 protein expression is associated with improved overall survival in high-grade serous ovarian carcinoma: an Ovarian Tumor Tissue Analysis Consortium Study**

---

**Supplementary material**

---

**Supplementary table 1** Monoclonal primary antibodies used in IHC staining of OC tumours in TMAs, contributed to this project by OTTA studies

**Supplementary table 2** OTTA studies participating in the study and ethics approval (**uploaded separately**)

**Supplementary table 3** On-slide positive and negative tissue controls for GMNN and FOXJ1 IHC staining, arrayed on TMAs examined in the final scoring cohorts of 5503 and 7759 OC cases, respectively

**Supplementary table 4** Top 90 prognostic genes identified by NanoString analysis, ranked by their association with HGSC survival (n=3,769)

**Supplementary table 5** Clinicopathological characteristics by histotype of the 5470 OC patients, with complete survival data, examined by GMNN expression

**Supplementary table 6** Association of stratified FOXJ1 and GMNN protein expression and OS in HGSC, where cases were known to have not been treated with NACT (n=4440 and 4009 respectively)

---

**Supplementary table 1** Monoclonal primary antibodies used in IHC staining of OC tumours in TMAs, contributed to this project by OTTA studies

| Protein of interest | Antibody [clone] (catalogue number) <sup>a</sup>           | Epitope recognised by the antibody <sup>b</sup>             | Dilution | Linker used to amplify signal <sup>c</sup> | Recommended positive IHC controls <sup>d</sup> |
|---------------------|------------------------------------------------------------|-------------------------------------------------------------|----------|--------------------------------------------|------------------------------------------------|
| GMNN                | Anti-Geminin antibody [EPR14637] (ab195047)                | Geminin AA 100 to the C-terminus                            | 1/1000   | N/A <sup>e</sup>                           | Tonsil                                         |
| FOXJ1               | Anti-FoxJ1 antibody [EPR21874] (ab235445)                  | FOXJ1 AA 50 to the C-terminus                               | 1/300    | EnVision FLEX+ rabbit linker               | Normal fallopian tube tissue                   |
| FEN1                | Anti-FEN1 antibody [EPR4460(2)] (ab109132)                 | FEN1 AA 300-400                                             | 1/500    | N/A <sup>e</sup>                           | Tonsil, intestinal epithelium                  |
| HIST1H2BD           | Anti-Histone H2B (acetyl K20) antibody [EPR859] (ab177430) | Synthetic peptide within Human Histone H2B AA 1-100         | 1/1000   | N/A <sup>e</sup>                           | Ubiquitous                                     |
| SNRPA1              | Anti-SNRPA1 antibody [EPR7557] (ab128937)                  | Synthetic peptide corresponding to residues in Human SNRPA1 | 1/100    | N/A <sup>e</sup>                           | Ubiquitous                                     |

<sup>a</sup>Primary antibodies supplied by Abcam Inc (Cambridge, MA, USA)

<sup>b</sup>Exact immunogen sequence is proprietary

<sup>c</sup>Linker molecules supplied by Aligent (Santa Clara, CA, USA)

<sup>d</sup>Recommended by antibody supplier, Abcam Inc (Cambridge, MA, USA), and assessed by MK in the standardisation of IHC staining protocol

<sup>e</sup>No linker used

**Amino acid (AA); Immunohistochemistry (IHC); Ovarian carcinoma (OC); Ovarian Tumour Tissue Analysis (OTTA); Tissue microarray (TMA)**

**Supplementary table 2** OTTA studies participating in the study and ethics approval

**Uploaded separately**

**Supplementary table 3** On-slide positive and negative tissue controls for GMNN and FOXJ1 IHC staining, arrayed on TMAs examined in the final scoring cohorts of 5503 and 7759 OC cases, respectively

| Study <sup>a</sup> | GMNN           |                                       |               | FOXJ1          |                                |                                    |
|--------------------|----------------|---------------------------------------|---------------|----------------|--------------------------------|------------------------------------|
|                    | n <sup>b</sup> | On-slide controls <sup>c</sup>        |               | n <sup>b</sup> | On-slide controls <sup>c</sup> |                                    |
|                    |                | Positive <sup>d</sup>                 | Negative      |                | Positive <sup>d</sup>          | Negative                           |
| AOV                | 14             | W                                     | J, K, P, R    | 98             | N/A <sup>e</sup>               | J, K, P, R, W                      |
| CAL                | 8              | W                                     | N/A           | 8              | N/A <sup>e</sup>               | W                                  |
| CNI                | 18             | A, B, C, D, E, F, H, L, M, Q, T, U, W | R, V          | 18             | F, L, T                        | A, B, C, D, E, H, M, Q, R, U, V, W |
| DOV                | 8              | L, Q, W                               | I, J, K, R, S | 8              | L                              | I, J, K, Q, R, S, W                |
| DUK                | 0              | N/A                                   | N/A           | 0              | N/A <sup>e</sup>               | N/A <sup>e</sup>                   |
| HAW                | 48             | A, D, W                               | J, K, P, R, S | 48             | N/A <sup>e</sup>               | A, D, J, K, P, R, S, W             |
| HOP                | 8              | N/A                                   | I, J, K, S    | 8              | N/A <sup>e</sup>               | I, J, K, S                         |
| LAX                | 76             | N/A                                   | N, O          | 76             | O                              | N                                  |
| POC                | 0              | N/A                                   | N/A           | 0              | N/A <sup>e</sup>               | N/A <sup>e</sup>                   |
| SEA                | 32             | N/A                                   | I, J, K, S    | 32             | N/A <sup>e</sup>               | I, J, K, S                         |
| TVA                | 68             | Q, W                                  | J, K, P       | 68             | N/A <sup>e</sup>               | J, K, P, Q, W                      |
| UKO                | 16             | N/A                                   | I, J, K, S    | 16             | N/A <sup>e</sup>               | I, J, K, S                         |
| VAN                | 64             | D, F                                  | G             | 64             | F, G                           | D                                  |
| AOC                |                |                                       |               | 16             | N/A <sup>e</sup>               | K                                  |
| BAV                |                |                                       |               | 0              | N/A <sup>e</sup>               | N/A <sup>e</sup>                   |
| MAY                |                |                                       |               | 0              | N/A <sup>e</sup>               | N/A <sup>e</sup>                   |

<sup>a</sup>OTTA studies participating in this project; Supplementary table 2 details their contribution

<sup>b</sup>Total number of control cores on all TMAs analysed, from each study; in cases where the number of cores does not match the listed tissues, some tissue cores were in replicates

<sup>c</sup>Studies that contributed multiple TMAs had on-slide controls on all TMAs

<sup>d</sup>A lack of data on GMNN expression analysed by IHC in these tissue types meant they could not be separated into low and high expressor positive controls

<sup>e</sup>No control tissue present

**Breast (A); Breast carcinoma (B); Chronic lymphocytic leukemia (C); Colon (D); Endocervix (E); Endometrium (F); Fallopian tube (G); Glioblastoma (H); Heart (I); Immunohistochemistry (IHC); Kidney (J); Liver (K); Lung (L); Lymphoma (M); Ovarian fibroma (N); Ovarian serous cystadenoma (O); Pancreas (P); Placenta (Q); Prostate (R); Spleen (S); Stomach (T); Tissue microarray (TMA); Testicular tumour (U); Thyroid (V); Tonsil (W)**

**Supplementary table 4** Top 90 prognostic genes identified by NanoString analysis, ranked by their association with HGSC survival (n=3,769)

| Ranking <sup>a</sup> | Gene          | Abcam antibody <sup>c</sup> | Localisation         | Staining <sup>b</sup> |
|----------------------|---------------|-----------------------------|----------------------|-----------------------|
| 1                    | TAP1          | Yes                         | Cytoplasmic          | Failed                |
| 2                    | CXCL9         | Yes                         | Cytoplasmic          | Failed                |
| 3                    | ZFHX4         | No                          |                      |                       |
| 4                    | PTGER3        | Yes                         | Membranous           | Failed                |
| 5                    | CD38          | Yes                         | Membranous           | Good                  |
| 6                    | TRIM27        | No                          |                      |                       |
| 7                    | CXCL10        | No                          |                      |                       |
| 8                    | FBN1          | No                          |                      |                       |
| 9                    | TIMP3         | Yes                         | Cytoplasmic/stromal  |                       |
| 10                   | SLAMF7        | Yes                         | Membranous           |                       |
| 11                   | COL3A1        | No                          |                      |                       |
| 12                   | IGHM          | No                          |                      |                       |
| 13                   | SERPINE1      | No                          |                      |                       |
| 14                   | CXCL11        | No                          |                      |                       |
| <b>15</b>            | <b>GMNN</b>   | <b>Yes</b>                  | <b>Nuclear</b>       | <b>Good</b>           |
| 16                   | SVIL          | No                          |                      |                       |
| <b>17</b>            | <b>SNRPA1</b> | <b>Yes</b>                  | <b>Nuclear</b>       | <b>Good</b>           |
| 18                   | SPARC         | Yes                         | Stromal              | Failed                |
| 19                   | PCDH9         | No                          |                      |                       |
| 20                   | MRPS27        | No                          |                      |                       |
| 21                   | CD27          | Yes                         | Membranous           |                       |
| 22                   | ASRGL1        | No                          |                      |                       |
| 23                   | IGF1          | No                          |                      |                       |
| 24                   | COL5A2        | No                          |                      |                       |
| 25                   | CTSK          | Yes                         | Cytoplasmic          |                       |
| 26                   | ENOX1         | No                          |                      |                       |
| 27                   | FAP           | No                          |                      |                       |
| 28                   | UCP2          | No                          |                      |                       |
| 29                   | IDO1          | Yes                         | Cytoplasmic          |                       |
| 30                   | FABP4         | Yes                         | Cytoplasmic, nuclear |                       |
| 31                   | PARP4         | No                          |                      |                       |
| 32                   | DUSP1         | Yes                         | Cytoplasmic          |                       |
| 33                   | DCN           | Yes                         | Stromal              | Failed                |
| 34                   | IGJ           | Yes                         | Plasma cells         |                       |
| 35                   | ADH1B         | No                          |                      |                       |
| 36                   | COL1A2        | Yes                         | Stromal              |                       |
| 37                   | COL11A1       | No                          |                      |                       |
| 38                   | MAP1LC3A      | Yes                         | Cytoplasmic          |                       |
| 39                   | RASA1         | Yes                         | Cytoplasmic          |                       |
| 40                   | PCK2          | Yes                         | Mitochondrial        |                       |
| 41                   | GALNT6        | No                          |                      |                       |
| 42                   | GJB1          | Yes                         | Membranous           |                       |
| 43                   | LUM           | Yes                         | Stromal              |                       |
| 44                   | TBC1D8B       | No                          |                      |                       |
| 45                   | INHBA         | Yes                         | Stromal              |                       |
| 46                   | ADAMDEC1      | No                          |                      |                       |
| 47                   | NUAK1         | No                          |                      |                       |

|           |                  |            |                |             |
|-----------|------------------|------------|----------------|-------------|
| <b>48</b> | <b>FOXJ1</b>     | <b>Yes</b> | <b>Nuclear</b> | <b>Good</b> |
| 49        | RBMS3            | No         |                |             |
| 50        | CCL5             | No         |                |             |
| 51        | HBB              | No         |                |             |
| 52        | PD.L1            | Yes        | Cytoplasmic    |             |
| 53        | MPZL2            | No         |                |             |
| 54        | FAM58A           | No         |                |             |
| 55        | THBS2            | No         | Stromal        |             |
| 56        | FGF1             | No         |                |             |
| 57        | CTLA4            | Yes        | Membranous     |             |
| 58        | C19orf12         | No         |                |             |
| <b>59</b> | <b>HIST1H2BD</b> | <b>Yes</b> | <b>Nuclear</b> | <b>Good</b> |
| 60        | PLK2             | No         |                |             |
| 61        | TMEM45A          | No         |                |             |
| 62        | LOX              | Yes        | Cytoplasmic    |             |
| 63        | OLFML3           | No         |                |             |
| 64        | CDK6             | No         |                |             |
| 65        | SORL1            | Yes        | Cytoplasmic    |             |
| 66        | B4GALT5          | No         |                |             |
| 67        | PDGFRB           | Yes        | Stromal        |             |
| 68        | SAC3D1           | No         |                |             |
| 69        | ESD              | No         |                |             |
| 70        | MAK              | No         |                |             |
| 71        | SEMA4D           | Yes        | Cytoplasmic    |             |
| 72        | RB1              | Yes        | Nuclear        | Good*       |
| 73        | SACS             | No         |                |             |
| 74        | ZC3H13           | No         |                |             |
| 75        | HIST1H2BG        | No         |                |             |
| <b>76</b> | <b>FEN1</b>      | <b>Yes</b> | <b>Nuclear</b> | <b>Good</b> |
| 77        | GFRA1            | No         |                |             |
| 78        | SUPT6H           | No         |                |             |
| 79        | APC              | Yes        | Cytoplasmic    |             |
| 80        | APBB2            | Yes        | Cytoplasmic    |             |
| 81        | COL5A1           | No         |                |             |
| 82        | TUBB6            | No         |                |             |
| 83        | IGKC             | Yes        | Plasma cells   |             |
| 84        | ENPP1            | Yes        | Membranous     |             |
| 85        | LRRC15           | No         |                |             |
| 86        | CRISPLD2         | No         |                |             |
| 87        | IGF2             | No         |                |             |
| 88        | CX3CR1           | No         |                |             |
| 89        | APC              | Yes        | Cytoplasmic    |             |
| 90        | PDS5B            | No         |                |             |

<sup>a</sup>Genes ranked by prognostic significance

<sup>b</sup>Currently, not all genes have been assessed by IHC staining.

· High quality antibody either rabbit or mouse monoclonal suitable for IHC-P, judged based on pictures provided by manufacture

· <sup>c</sup> Manuscript in preparation

**Supplementary table 5** Clinicopathological characteristics by histotype of the 5470 OC patients, with complete survival data, examined by GMNN expression

| Characteristic                      | HGSC            | LGSC            | MC              | EC              | CCC             |
|-------------------------------------|-----------------|-----------------|-----------------|-----------------|-----------------|
| Number of cases, n (%) <sup>a</sup> | 4185 (76.5)     | 160 (2.9)       | 174 (3.2)       | 518 (9.5)       | 433 (7.9)       |
| Age at diagnosis, years             |                 |                 |                 |                 |                 |
| Mean $\pm$ SD                       | 60.4 $\pm$ 10.6 | 55.0 $\pm$ 12.3 | 53.2 $\pm$ 14.6 | 55.0 $\pm$ 11.1 | 55.5 $\pm$ 11.0 |
| Median                              | 61              | 56              | 53              | 54              | 55              |
| Range                               | 21-92           | 23-88           | 16-83           | 28-88           | 28-89           |
| Stage, n (%) <sup>b</sup>           |                 |                 |                 |                 |                 |
| FIGO I, II (localised)              | 802 (19.2)      | 51 (31.9)       | 147 (84.5)      | 442 (85.3)      | 344 (79.5)      |
| FIGO III, IV (distant)              | 3383 (80.8)     | 109 (68.1)      | 27 (15.5)       | 76 (14.7)       | 89 (20.6)       |
| Outcome <sup>c</sup>                |                 |                 |                 |                 |                 |
| Alive, n (%) <sup>b</sup>           | 1259 (29.8)     | 66 (41.3)       | 119 (68.4)      | 371 (71.6)      | 263 (60.7)      |
| Dead, n (%) <sup>b</sup>            | 2949 (70.2)     | 94 (58.8)       | 55 (31.6)       | 147 (28.4)      | 170 (39.3)      |
| 5-year survival, % $\pm$ SE         | 39.1 $\pm$ 0.8  | 59.4 $\pm$ 4.3  | 68.1 $\pm$ 4.1  | 81.6 $\pm$ 1.9  | 65.7 $\pm$ 2.5  |

<sup>a</sup>The proportion of cases in each histotypes is given as a percentage of the total patients examined

<sup>b</sup>The proportion of cases is given as a percentage of the total cases within each histotypes

<sup>c</sup>Final status of the patient, being alive or dead, at 10years, following enrollment in an OTTA

**Clear cell ovarian carcinoma (CCC); Endometrioid ovarian carcinoma (EC); High-grade serous ovarian carcinoma (HGSC); International Federation of Gynecology and Obstetrics (FIGO); Low-grade serous ovarian carcinoma (LGSC); Standard deviation (SD); Standard error (SE)**

**Supplementary table 6** Association of stratified FOXJ1 and GMNN protein expression and OS in HGSC, where cases were known to have not been treated with NACT (n=4440 and 4009 respectively)

| Marker | Expression | n <sup>a</sup> | 5-yr survival (% ± SE) | HR (95% CI) <sup>b</sup> | p-value        |
|--------|------------|----------------|------------------------|--------------------------|----------------|
| FOXJ1  | 0%         | 1269           | 36.5 ± 1.4             | ref                      | <b>0.0003*</b> |
|        | 5%         | 928            | 35.0 ± 1.6             | 1.03 (0.93-1.14)         |                |
|        | 10%-15%    | 881            | 41.6 ± 1.7             | 0.91 (0.82-1.01)         |                |
|        | 20%-45%    | 1018           | 43.5 ± 1.6             | <b>0.86 (0.78-0.95)*</b> |                |
|        | 50%-100%   | 344            | 49.4 ± 2.9             | <b>0.77 (0.66-0.90)*</b> |                |
| GMNN   | 0%         | 244            | 40.4 ± 3.3             | ref                      | <b>0.003*</b>  |
|        | 5%         | 731            | 40.0 ± 1.8             | 1.10 (0.92-1.31)         |                |
|        | 10%-15%    | 1335           | 38.9 ± 1.3             | 1.08 (0.91-1.28)         |                |
|        | 20%-25%    | 922            | 40.3 ± 1.6             | 0.95 (0.79-1.13)         |                |
|        | 30%        | 178            | 36.9 ± 3.6             | 1.0 (0.80-1.28)          |                |
|        | 35%-100%   | 236            | 46.8 ± 3.3             | 0.81 (0.64-1.02)         |                |

<sup>a</sup>The same cohort was assessed in univariate survival analysis

<sup>b</sup>HR adjusted for patient age, stage and OTTA study; Cox proportional regression modelling was used to calculate p-values and define significance. Statistically significant values shown in bold; \* p<0.05

**Confidence interval (CI); High-grade serous ovarian carcinoma (HGSC); Hazard ratio (HR); Overall survival (OS)**
