# Supplementary material for: Increased FOXJ1 protein expression is associated with improved overall survival in high-grade serous ovarian carcinoma: an Ovarian Tumor Tissue Analysis Consortium Study
Source: PubMed Central journal article supplement (PMC9814937; doi:10.1038/s41416-022-02014-y), 2022-11-02
Supplement: 41416_2022_2014_MOESM4_ESM.pdf [file 41416_2022_2014_MOESM4_ESM.pdf]

## Increased FOXJ1 protein expression is associated with improved overall survival in high-grade serous ovarian carcinoma: an Ovarian Tumor Tissue Analysis Consortium Study

Supplementary table 2 OTTA studies participating in the study and ethics approval

| OTTA study | Name                              | Location  | Years     | Ascertainment of patients and clinical data                                                                                      | Pathology data and review                                                        | Ethics committee                                                          | Informed consent        | FOXJ1 cohort n (%) <sup>a b</sup> | GMNN cohort n (%) <sup>a b</sup> |
|------------|-----------------------------------|-----------|-----------|----------------------------------------------------------------------------------------------------------------------------------|----------------------------------------------------------------------------------|---------------------------------------------------------------------------|-------------------------|-----------------------------------|----------------------------------|
| AOC        | Australian Ovarian Cancer Study   | Australia | 2002-2006 | Treatment centers throughout Australia; cancer registries serving Queensland, South and West Australia; regular follow-up visits | Central review of pathology reports and histological slides by study pathologist | Peter MacCallum Cancer Centre Human Research Ethics Committee             | Yes                     | 207 (3.2)                         | 199 (3.6)                        |
| AOV        | Alberta Ovarian Tumor Types Study | Canada    | 1978-2010 | Population-based Alberta Cancer Registry; annual updates are performed for vital statistics                                      | Central review of pathology reports and histological slides by study pathologist | Alberta Health Services, Research Ethics                                  | No / pathology material | 416 (6.5)                         | 63 (1.2)                         |
| BAV        | Bavarian Ovarian Cancer Study     | Germany   | 2002-2006 | Gynaecologic Oncology Center at the Comprehensive Cancer Center Erlangen-Nuremberg                                               | Central review of pathology reports and histological slides by study pathologist | Ethics Committee of the Friedrich-Alexander-University Erlangen-Nuremberg | Yes                     | 214 (3.3)                         | 192 (3.5)                        |
| BRZ        | Brazil Gynecologic                | Brazil    | 1987-2010 | University Hospital of Ribeirao Preto                                                                                            | Pathology reports and histologic slides reviewed                                 | Research Ethics Committee of Hospital das                                 | No / pathology material | 100 (1.6)                         | 86 (1.6)                         |

|     |                                                              |               |           |                                                                   |                                                                                                                                                                                                                                                                       |                                                                           |     |             |             |
|-----|--------------------------------------------------------------|---------------|-----------|-------------------------------------------------------------------|-----------------------------------------------------------------------------------------------------------------------------------------------------------------------------------------------------------------------------------------------------------------------|---------------------------------------------------------------------------|-----|-------------|-------------|
|     | Tumor Bank (BRZ) study                                       |               |           | School of Medicine (HCRP), case series with prospective follow up | by HCRP gynaecologic pathologists                                                                                                                                                                                                                                     | Clínicas of the Ribeirão Preto Medical School                             |     |             |             |
| CAL | Calgary Serous Carcinoma Study                               | Canada        | 2003-2007 | Hospital based retrospective observational study                  | Central review of pathology reports and histological slides by study pathologist                                                                                                                                                                                      | Conjoint Health Research Ethics Board                                     | Yes | 107 (1.7)   | 101 (1.9)   |
| CNI | Spanish National Cancer Research Centre Ovarian Cancer Study | Spain         | 2006-2013 | Hospitals in Madrid in Medical Oncology Divisions                 | Pathology information was obtained through medical chart review in the Medical Oncology units                                                                                                                                                                         | Bioethics and Animal Welfare Committee of the Carlos III Health Institute | Yes | 68 (1.1)    | 33 (0.6)    |
| DOV | Diseases of the Ovary and their Evaluation                   | United States | 2002-2009 | Fred Hutchinson Cancer Research Center                            | Two stage review: Central review of pathology reports and histological slides by study pathologist. Histotype was then assigned by the pathologist through 2014 WHO diagnostic classification guidelines and re-reviewing the H&E stained slide of the primary tumour | Fred Hutchinson Cancer Research Center Institutional Review Board         | Yes | 1054 (16.4) | 1042 (19.1) |
| DUK | Duke University Medical Center                               | United States | 2008-2009 | Duke University Medical Center, North Carolina                    | Stained histological slides reviewed centrally by study pathologist                                                                                                                                                                                                   | Duke University Health System Institutional Review Board                  | Yes | 39 (0.6)    | 42 (0.8)    |
| HAW | Hawaii Ovarian Cancer Study                                  | United States | 1993-2008 | Hawaii Tumor Registry and medical records                         | Central review of pathology reports and histological slides by study pathologist                                                                                                                                                                                      | University of Hawaii, Committee on Human Studies                          | Yes | 122 (1.9)   | 122 (2.2)   |

|     |                                                                                           |                  |                  |                                                                                                                                             |                                                                                                           |                                                                                                                                     |     |                |               |
|-----|-------------------------------------------------------------------------------------------|------------------|------------------|---------------------------------------------------------------------------------------------------------------------------------------------|-----------------------------------------------------------------------------------------------------------|-------------------------------------------------------------------------------------------------------------------------------------|-----|----------------|---------------|
| HMC | (HM-Ciocc)<br>HM<br>Hospitales –<br>Centro<br>Integral<br>Oncológico<br>HM Clara<br>Campa | Spain            | 2016-<br>2021    | Department of<br>Gynecological<br>Tumors at HM<br>Hospitals                                                                                 | Central review of<br>pathology reports and<br>histological slides by<br>study pathologist                 | Research and<br>Ethics committee<br>of HM hospital                                                                                  | Yes | 70 (1.1)       | 69 (1.3)      |
| HOP | Hormones and<br>Ovarian<br>Cancer<br>PrEdiction                                           | United<br>States | 2003-<br>2009    | Hospital<br>registries and<br>active<br>surveillance of<br>medical<br>practices in<br>Western PA,<br>North-eastern<br>OH, and<br>Western NY | Pathology information<br>was obtained through<br>medical chart review in<br>the Medical Oncology<br>units | University of<br>Pittsburgh<br>Insitutional<br>Review Board and<br>Roswell Park<br>Cancer Institute<br>Insitutional<br>Review Board | Yes | 36 (0.6)       | 37 (0.7)      |
| LAX | Women's<br>Cancer<br>Research<br>Program -<br>Cedars-Sinai<br>Medical<br>Center           | United<br>States | 1989-<br>present | Women's Cancer<br>Program<br>Biorepository                                                                                                  | Central review of<br>pathology reports and<br>histological slides by<br>study pathologist                 | Institutional<br>Review Board 3 of<br>Cedars-Sinai<br>Medical Center                                                                | Yes | 147 (2.3)      | 139 (2.5)     |
| MAY | Mayo Clinic<br>Ovarian<br>Cancer Study                                                    | United<br>States | 2000-<br>2013    | Mayo Clinic<br>medical records<br>and death<br>certificates                                                                                 | Central review of<br>pathology reports and<br>histological slides by<br>study pathologist                 | Institutional<br>Review Board of<br>Mayo Clinic                                                                                     | Yes | 1034<br>(16.1) | 584<br>(10.7) |
| NCT | Natl. Centre of<br>Tumor<br>Diseases and<br>the Dept. of<br>Pathology,<br>Heidelberg      | Germany          | 2004-<br>2016    | Natl. Centre of<br>Tumor Diseases<br>and the Dept. of<br>Pathology,<br>Heidelberg                                                           | Pathology reports and<br>histologic slides reviewed<br>by gynaecologic<br>pathologist                     | Ethics-Committee<br>of the Medical<br>Faculty at the<br>University of<br>Heidelberg                                                 | Yes | 40 (0.6)       | 41 (0.8)      |
| POC | Polish Ovarian<br>Cancer Study                                                            | Poland           | 2000-<br>2003    | Hospital records<br>and cancer<br>registries<br>serving Warsaw<br>and Lodz                                                                  | Stained histological slides<br>reviewed centrally by<br>study pathologist                                 | Bioethical<br>Committee of<br>Pomeranian<br>Medical University                                                                      | Yes | 83 (1.3)       | 80 (1.5)      |

|     |                                                           |                |              |                                                                                                               |                                                                                  |                                                                                     |     |           |           |
|-----|-----------------------------------------------------------|----------------|--------------|---------------------------------------------------------------------------------------------------------------|----------------------------------------------------------------------------------|-------------------------------------------------------------------------------------|-----|-----------|-----------|
| SEA | Study of Epidemiology and Risk Factors in Cancer Heredity | United Kingdom | 1998-present | Eastern Region Cancer Intelligence Unit, West Midlands Cancer Intelligence Unit, and multiple cancer networks | Central review of pathology reports and histological slides by study pathologist | Cambridgeshire 4 Research Ethics Committee                                          | Yes | 549 (8.5) | 521 (9.5) |
| TUE | Tuebingen University Women's Hospital (TUE) study         | Germany        | 1999-2008    | Department of Obstetrics and Gynaecology, Eberhard Karls Universitats Tubingen, Tubingen Germany           | Pathology reports and histologic slides reviewed by gynaecologic pathologist     | Ethics-Committee at the Medical Faculty and at the University Hospital of Tubingen | Yes | 388 (6.0) | 366 (6.7) |
| TVA | Ovarian Cancer in Alberta                                 | Canada         | 2004-2012    | Alberta Cancer Registry and Provincial Cancer Treatment Centers                                               | Central review of pathology reports and histological slides by study pathologist | University of Calgary, Conjoint Health Research Ethics Committee                    | Yes | 138 (2.1) | 136 (2.5) |

|                     |                                                |                |           |                                                                                                                                                                                                                             |                                                                                        |                                                                                                                                                                                                                  |                                                       |              |              |
|---------------------|------------------------------------------------|----------------|-----------|-----------------------------------------------------------------------------------------------------------------------------------------------------------------------------------------------------------------------------|----------------------------------------------------------------------------------------|------------------------------------------------------------------------------------------------------------------------------------------------------------------------------------------------------------------|-------------------------------------------------------|--------------|--------------|
| UKO                 | United Kingdom Ovarian Cancer Population study | United Kingdom | 2006-2010 | Ten major Gynaecologic Oncology NHS centers in England, Wales and Northern Ireland; cancer registries; NHS Information Centre for Health and Social Care (England and Wales) and Central Services Agency (Northern Ireland) | Central review of pathology reports by gynaecologic oncologist                         | National Health Service Central Office for Research Ethics Committees (COREC) and The Joint University College London/University College London Hospital Committee on the Ethics of Human Research (Committee A) | Yes                                                   | 102 (1.6)    | 102 (1.9)    |
| VAN                 | Vancouver Ovarian Cancer Study                 | Canada         | 1984-2000 | Ovarian Cancer Registry serving British Columbia and the Cheryl Brown Outcomes Unit                                                                                                                                         | Central review of pathology reports and histological slides by study pathologist       | University of British Columbia - British Columbia Cancer Agency Research Ethics Board                                                                                                                            | Some cases yes and some cases no / pathology material | 1320 (20.5)  | 1327 (24.3)  |
| WMH                 | WestMead Hospital                              | Australia      | 1992-2014 | The Crown Princess Mary Cancer Centre and affiliated hospitals                                                                                                                                                              | Pathology reports and diagnostic slides reviewed by panel of gynaecologic pathologists | Western Sydney Local Health District, Human Research Ethics Committee                                                                                                                                            | Yes                                                   | 200 (3.1)    | 189 (3.5)    |
| <b>Total cohort</b> |                                                |                |           |                                                                                                                                                                                                                             |                                                                                        |                                                                                                                                                                                                                  |                                                       | 6434 (100.0) | 5470 (100.0) |

<sup>a</sup> Sample sizes reflect ovarian carcinoma cases that have met the inclusion criteria for this study

<sup>b</sup> The proportion of cases is given as a percentage of the total cases assessed for each marker
