# Supplementary material for: Increased FOXJ1 protein expression is associated with improved overall survival in high-grade serous ovarian carcinoma: an Ovarian Tumor Tissue Analysis Consortium Study
Source: PubMed Central journal article supplement (PMC9814937; doi:10.1038/s41416-022-02014-y), 2022-11-02
Supplement: 41416_2022_2014_MOESM5_ESM.pdf [file 41416_2022_2014_MOESM5_ESM.pdf]

## **AOCS STUDY GROUP**

**Management Group:** D Bowtell<sup>1,3,4,5,6</sup>, G Chenevix-Trench<sup>2</sup>, A Green<sup>2</sup>, P Webb<sup>2</sup>, A DeFazio<sup>7,8,9</sup>, D Gertig<sup>10</sup>

**Project and Data Managers:** N Traficante<sup>1,4</sup>, S Fereday<sup>1,4</sup>, S Moore<sup>2</sup>, J Hung<sup>7</sup>, K Harrap<sup>2</sup>, T Sadkowsky<sup>2</sup>, N Pandeya<sup>2</sup>

### **Research Nurses and Assistants:**

M Malt<sup>2</sup>, A Mellon<sup>11</sup>, R Robertson<sup>11</sup>, T Vanden Bergh<sup>12</sup>, M Jones<sup>12</sup>, P Mackenzie<sup>12</sup>, J Maidens<sup>13</sup>, K Nattress<sup>14</sup>, YE Chiew<sup>7</sup>, A Stenlake<sup>9</sup>, H Sullivan<sup>9</sup>, B Alexander<sup>2</sup>, P Ashover<sup>2</sup>, S Brown<sup>2</sup>, T Corrish<sup>2</sup>, L Green<sup>2</sup>, L Jackman<sup>2</sup>, K Ferguson<sup>2</sup>, K Martin<sup>2</sup>, A Martyn<sup>2</sup>, B Ranieri<sup>2</sup>, J White<sup>15</sup>, V Jayde<sup>16</sup>, P Mamers<sup>17</sup>, L Bowes<sup>1</sup>, L Galletta<sup>1</sup>, D Giles<sup>1</sup>, J Hendley<sup>1</sup>, K Alsop<sup>1</sup>, T Schmidt<sup>18</sup>, H Shirley<sup>18</sup>, C Ball<sup>19</sup>, C Young<sup>19</sup>, S Viduka<sup>18</sup>, Hoa Tran<sup>18</sup>, Sanela Bilic<sup>18</sup>, Lydia Glavinas<sup>18</sup>, Julia Brooks<sup>20</sup>

### **Clinical and Scientific Collaborators:**

R Stuart-Harris<sup>21</sup>, F Kirsten<sup>22</sup>, J Rutovitz<sup>23</sup>, P Clingan<sup>24</sup>, A Glasgow<sup>24</sup>, A Proietto<sup>11</sup>, S Braye<sup>11</sup>, G Otton<sup>11</sup>, J Shannon<sup>25</sup>, T Bonaventura<sup>26</sup>, J Stewart<sup>26</sup>, S Begbie<sup>27</sup>, M Friedlander<sup>28</sup>, D Bell<sup>13</sup>, S Baron-Hay<sup>13</sup>, A Ferrier<sup>13</sup> (*dec.*), G Gard<sup>13</sup>, D Nevell<sup>13</sup>, N Pavlakis<sup>13</sup>, S Valmadre<sup>13</sup>, B Young<sup>13</sup>, C Camaris<sup>12</sup>, R Crouch<sup>12</sup>, L Edwards<sup>12</sup>, N Hacker<sup>12</sup>, D Marsden<sup>12</sup>, G Robertson<sup>12</sup>, P Beale<sup>14</sup>, J Beith<sup>14</sup>, J Carter<sup>14</sup>, C Dalrymple<sup>14</sup>, R Houghton<sup>14</sup>, P Russell<sup>14</sup>, M Links<sup>29</sup>, J Grygiel<sup>30</sup>, J Hill<sup>31</sup>, A Brand<sup>8,32</sup>, K Byth<sup>32</sup>, R Jaworski<sup>33</sup>, P Harnett<sup>8,32</sup>, R Sharma<sup>8,33</sup>, G Wain<sup>32</sup>, B Ward<sup>34</sup>, D Papadimos<sup>34</sup>, A Crandon<sup>35</sup>, M Cummings<sup>35</sup>, K Horwood<sup>35</sup>, A Obermair<sup>35</sup>, L Perrin<sup>35</sup>, D Wyld<sup>35</sup>, J Nicklin<sup>35,36</sup>, M Davy<sup>15</sup>, MK Oehler<sup>15</sup>, C Hall<sup>15</sup>, T Dodd<sup>15</sup>, T Healy<sup>37</sup>, K Pittman<sup>37</sup>, D Henderson<sup>37</sup>, J Miller<sup>39</sup>, J Pierdes<sup>39</sup>, P Blomfield<sup>16</sup>, D Challis<sup>16</sup>, R McIntosh<sup>16</sup>, A Parker<sup>16</sup>, B Brown<sup>40</sup>, R Rome<sup>40</sup>, D Allen<sup>41</sup>, P Grant<sup>41</sup>, S Hyde<sup>41</sup>, R Laurie<sup>41</sup>, M Robbie<sup>41</sup>, D Healy<sup>17</sup>, T Jobling<sup>17</sup>, T Manolitsas<sup>17</sup>, J McNealage<sup>17</sup>, P Rogers<sup>17</sup>, B Susil<sup>17</sup>, E Sumithran<sup>17</sup>, I Simpson<sup>17</sup>, K Phillips<sup>1</sup>, D Rischin<sup>1</sup>, S Fox<sup>1</sup>, D Johnson<sup>1</sup>, S Lade<sup>1</sup>, M Loughrey<sup>1</sup>, N O'Callaghan<sup>1</sup>, W Murray<sup>1</sup>, P Waring<sup>3</sup>, V Billson<sup>42</sup>, J Pyman<sup>42</sup>, D Neesham<sup>42</sup>, M Quinn<sup>42</sup>, C Underhill<sup>43</sup>, R Bell<sup>44</sup>, LF Ng<sup>45</sup>, R Blum<sup>46</sup>, V Ganju<sup>47</sup>, I Hammond<sup>19</sup>, Y Leung<sup>19</sup>, A McCartney<sup>19</sup> (*dec.*), M Buck<sup>48</sup>, I Haviv<sup>49</sup>, D Purdie<sup>2</sup>, D Whiteman<sup>2</sup>, N Zeps<sup>18</sup>

<sup>1</sup>Peter MacCallum Cancer Centre, Melbourne, Victoria, 3000, Australia.

<sup>2</sup>QIMR Berghofer Medical Research Institute, Brisbane, Queensland, 4006, Australia.

<sup>3</sup>Department of Pathology, University of Melbourne, Parkville, Victoria, 3052, Australia.

<sup>4</sup>Sir Peter MacCallum Cancer Centre Department of Oncology, University of Melbourne, Parkville, Victoria, 3052, Australia.

<sup>5</sup>Department of Biochemistry and Molecular Biology, University of Melbourne, Parkville, Victoria, 3052, Australia.

<sup>6</sup>Ovarian Cancer Action Research Centre, Department of Surgery and Cancer, Imperial College London, London, England, W12 0HS, UK.

<sup>7</sup>Centre for Cancer Research, The Westmead Institute for Medical Research, Sydney, New South Wales, 2145, Australia

<sup>8</sup>The University of Sydney, Sydney, New South Wales, 2006, Australia.

<sup>9</sup>Department of Gynaecological Oncology, Westmead Hospital, Sydney, New South Wales, 2145, Australia.

<sup>10</sup>Melbourne School of Population and Global Health, University of Melbourne, Parkville, Victoria, 3052, Australia.

<sup>11</sup>John Hunter Hospital, Lookout Road, New Lambton, New South Wales, 2305, Australia

<sup>12</sup>Royal Hospital for Women, Barker Street, Randwick, New South Wales, 2031, Australia

<sup>13</sup>Royal North Shore Hospital, Reserve Road, St Leonards, New South Wales, 2065, Australia

<sup>14</sup>Royal Prince Alfred Hospital, Missenden Road, Camperdown, New South Wales, 2050, Australia

<sup>15</sup>Royal Adelaide Hospital, North Terrace, Adelaide, South Australia, 5000, Australia

<sup>16</sup>Royal Hobart Hospital, 48 Liverpool St, Hobart, Tasmania, 7000, Australia

<sup>17</sup> Monash Medical Centre, 246 Clayton Rd, Clayton, Victoria, 3168, Australia

<sup>18</sup>Western Australian Research Tissue Network (WARTN), St John of God Pathology, 23 Walters Drive, Osborne Park, Western Australia, 6017, Australia

<sup>19</sup>Women and Infant's Research Foundation, King Edward Memorial Hospital, 374 Bagot Road, Subiaco, Western Australia, 6008, Australia

<sup>20</sup>St John of God Hospital, 12 Salvado Rd, Subiaco, Western Australia, 6008, Australia

<sup>21</sup>Canberra Hospital, Yamba Drive, Garran, Australian Capitol Territory, 2605, Australia

<sup>22</sup>Bankstown Cancer Centre, Bankstown Hospital, 70 Eldridge Road, Bankstown, New South Wales, 2200, Australia

<sup>23</sup>Northern Haematology & Oncology Group, Integrated Cancer Centre, 185 Fox Valley Road, Wahroonga, New South Wales, 2076, Australia

<sup>24</sup>Illawarra Shoalhaven Local Health District, Wollongong Hospital, Level 4 Lawson House, Wollongong, New South Wales, 2500, Australia

<sup>25</sup>Nepean Hospital, Derby Street, Kingswood, New South Wales, 2747, Australia

<sup>26</sup>Newcastle Mater Misericordiae Hospital, Edith Street, Waratah, New South Wales, 2298, Australia

- <sup>27</sup>Port Macquarie Base Hospital, Wrights Road, Port Macquarie, New South Wales, 2444, Australia
- <sup>28</sup>Prince of Wales Clinical School, University of New South Wales, New South Wales, 2031, Australia
- <sup>29</sup>St George Hospital, Gray Street, Kogarah, New South Wales, 2217, Australia
- <sup>30</sup>St Vincent's Hospital, 390 Victoria Street, Darlinghurst, New South Wales, 2010, Australia
- <sup>31</sup>Wagga Wagga Base Hospital, Docker St, Wagga Wagga, New South Wales, 2650, Australia
- <sup>32</sup>Crown Princess Mary Cancer Centre, Westmead Hospital, Westmead, Sydney, New South Wales, 2145, Australia.
- <sup>33</sup>Department of Pathology, Westmead Clinical School, Westmead Hospital, The University of Sydney, New South Wales, 2006, Australia
- <sup>34</sup>Mater Misericordiae Hospital, Raymond Terrace, South Brisbane, Queensland, 4101, Australia
- <sup>35</sup>The Royal Brisbane and Women's Hospital, Butterfield Street, Herston, Queensland, 4006, Australia
- <sup>36</sup> Wesley Hospital, 451 Coronation Drive, Auchenflower, Queensland, 4066, Australia
- <sup>37</sup>Burnside Hospital, 120 Kensington Road, Toorak Gardens, South Australia, 5065, Australia
- <sup>38</sup>Flinders Medical Centre, Flinders Drive, Bedford Park, South Australia, 5042, Australia
- <sup>39</sup>Queen Elizabeth Hospital, 28 Woodville Road, Woodville South, South Australia, 5011, Australia
- <sup>40</sup>Freemasons Hospital, 20 Victoria Parade, East Melbourne, Victoria, 3002, Australia
- <sup>41</sup>Mercy Hospital for Women, 163 Studley Road, Heidelberg, Victoria, 3084, Australia
- <sup>42</sup>The Royal Women's Hospital, Parkville, Victoria, 3052, Australia
- <sup>43</sup>Border Medical Oncology, Wodonga, Victoria, 3690, Australia
- <sup>44</sup>Andrew Love Cancer Centre, 70 Swanston Street, Geelong, Victoria, 3220, Australia
- <sup>45</sup>Ballarat Base Hospital, Drummond Street North, Ballarat, Victoria, 3350, Australia
- <sup>46</sup>Bendigo Health Care Group, 62 Lucan Street, Bendigo, Victoria, 3550, Australia
- <sup>47</sup>Peninsula Health, 2 Hastings Road, Frankston, Victoria, 3199, Australia
- <sup>48</sup>Mount Hospital, 150 Mounts Bay Road, Perth, Western Australia 6000, Australia
- <sup>49</sup>Faculty of Medicine, Bar-Ilan University, 8 Henrietta Szold St, Safed, Israel
